# Supplementary material for: Preparation and nanoaggregate formation ability in water of amphiphilic ladder-like polymers with parallelly linked hydrophilic polyether and hydrophobic polysiloxane chains
Source: Royal Society of Chemistry journal article supplement (doi:10.1039/d4py01316f), 2025-01-01
Supplement: d4py01316f1.pdf [file d4py01316f1.pdf]

Supplementary Information

**Preparation and nanoaggregate formation ability in water of  
amphiphilic ladder-like polymers with parallelly linked hydrophilic  
polyether and hydrophobic polysiloxane chains**

Shiori Matsuo,<sup>a</sup> Sho Nonaka,<sup>a</sup> Aki Mihata,<sup>a</sup> Kazuhiro Shikinaka<sup>b</sup> and Yoshiro Kaneko<sup>\*a</sup>

<sup>a</sup>. *Graduate School of Science and Engineering, Kagoshima University, 1-21-40 Korimoto,  
Kagoshima 890-0065, Japan*

<sup>b</sup>. *Research Institute for Chemical Process Technology, National Institute of Advanced Industrial  
Science and Technology (AIST), Nigatake, 4-2-1, Miyagino-ku, Sendai, Miyagi 983-8551, Japan*

\*To whom correspondence should be addressed (Tel: +81-99-285-7794, FAX: +81-99-285-7794,  
E-mail: ykaneko@eng.kagoshima-u.ac.jp)

## Experimental section

**Materials.** Ethylene glycol dimethyl ether (purity: 99.0%) and potassium bromide (KBr, purity: 99.0%) were purchased from Nacalai Tesque, Inc. Allyl glycidyl ether (purity: ~99.0%), 3-mercaptopropyl dimethoxymethylsilane (MPDMMS, purity: ~95.0%), phenylbis(2,4,6-trimethylbenzoyl)phosphine oxide (BAPO, purity: ~96.0%), dimethoxydimethylsilane (DMDMS, purity: ~98.0%), polyethylene glycol monomethyl ether acrylate (PEG-A;  $n = ca. 13$ , stabilized with hydroquinone monomethyl ether), tetramethylsilane (TMS, purity: ~99.0%), tris(2,4-pentanedionato)chromium(III) ( $\text{Cr}(\text{acac})_3$ , purity: ~98.0%) and tetraphenylporphyrin (TPP, purity: ~98.0%) were purchased from Tokyo Chemical Industry Co., Ltd. Potassium phenolate (purity: unknown), tetrahydrofuran (THF, purity: ~99.5%), *N,N*-dimethylformamide (DMF, purity: ~95.0%), diethyl ether (purity: ~99.5%), methanol (purity: ~99.5%), concentrated hydrochloric acid (conc. HCl, purity 35.0%–37.0%), dimethyl sulfoxide (DMSO, purity: ~99.0%), isopropyl alcohol (purity: ~99.7%), acetone (purity: ~99.0%), chloroform (purity: ~99.0%), ethyl acetate (purity: ~99.5%), hexane (purity: ~96.0%), methanol- $d_4$  ( $\text{CD}_3\text{OD}$ , purity: ~99.0%) and chloroform- $d$  ( $\text{CDCl}_3$ , purity: ~99.8%) were purchased from FUJIFILM Wako Pure Chemical Co., Ltd. Ethanol (purity: ~99.5%) was purchased from Japan Alcohol Trading Co., Ltd. PEG-*block*-PDMS-*block*-PEG (product code: DBE-C25) was purchased from Gelest Inc.

**Preparation of poly(allyl glycidyl ether) (PAGE).** PAGE was prepared according to a previous report.<sup>47</sup> Potassium phenolate (0.078 g, 0.67 mmol, calculated for 100% purity) was lyophilized for over 12 h, dissolved as an initiator in dried ethylene glycol dimethyl ether (15 mL) and repeatedly evacuated and purged with argon. While stirring, allyl glycidyl ether (2.536 g, 22.0 mmol) was added to the mixture. After stirring the reaction mixture at 110°C for 24 h under anhydrous conditions, it was poured into water (450 mL) and stirred at room temperature. The water-insoluble portion was then isolated by centrifugation, yielding PAGE as a light-brown viscous liquid (1.686 g, yield 67%, calculated according to the ideal chemical formula of the repeating unit of PAGE [ $\text{OCH}_2\text{CH}(\text{CH}_2\text{OCH}_2\text{CH}=\text{CH}_2$ ), FW = 114.14]). The number-average molecular weight ( $M_n$ ) of PAGE was estimated to be  $2.5 \times 10^3$  by gel permeation chromatography (GPC;  $M_w/M_n = 1.31$ ). Additionally, the average degree of polymerization was calculated to be 46 using the integral ratio of signal **e** to the signals **c**, which correspond to the phenolate-initiated end

groups and the double bonds in the repeating units, respectively, in the  $^1\text{H}$  NMR spectrum in  $\text{CD}_3\text{OD}$  (Fig. S1). Considering the formula weights of the initiating units and repeating units, the  $^1\text{H}$  NMR-based  $M_n$  was calculated to be  $5.3 \times 10^3$ .  $^1\text{H}$  NMR (400 MHz,  $\text{CD}_3\text{OD}$ , Fig. S1):  $\delta$  7.32–7.23 and  $\delta$  6.97–6.89 (m, 5H,  $\text{PhO}$ –),  $\delta$  6.06–5.98 (br, 1H,  $-\text{OCH}=\text{CHCH}_3$ ),  $\delta$  5.98–5.81 (m, 1H,  $-\text{OCH}_2\text{CH}=\text{CH}_2$ ),  $\delta$  5.40–5.10 (m, 2H,  $-\text{OCH}_2\text{CH}=\text{CH}_2$ ),  $\delta$  4.42–4.29 (m, 1H,  $-\text{OCH}=\text{CHCH}_3$ ),  $\delta$  4.10–3.93 (m, 2H,  $-\text{OCH}_2\text{CH}=\text{CH}_2$ ),  $\delta$  3.81–3.41 (m, 10H,  $-\text{OCH}_2\text{CH}(\text{CH}_2\text{OCH}_2\text{CH}=\text{CH}_2)\text{O}$ – and  $-\text{OCH}_2\text{CH}(\text{CH}_2\text{OCH}=\text{CHCH}_3)\text{O}$ –),  $\delta$  1.61–1.49 (d,  $J = 6.87$  Hz, 3H,  $-\text{OCH}=\text{CHCH}_3$ ).

**Preparation of PGE–PAMS (Scheme 1).** A solution of PAGE (0.114 g, 1.0 mmol unit) in dehydrated THF (1 mL) and MPDMMS (0.285 g, 1.5 mmol) in dehydrated THF (1 mL) was added to BAPO (0.007 g, 15  $\mu\text{mol}$ ). The resulting mixture was stirred at room temperature under an argon atmosphere and then irradiated with light (wavelength: 380–420 nm) for 5 min. Subsequently, DMF (1000 mL) and purified water (360  $\mu\text{L}$ , 20 mmol) were added to the solution, which was then stirred at 120°C for 120 h. The mixture was concentrated to *ca.* 10 mL using a rotary evaporator at *ca.* 80°C, poured into diethyl ether (300 mL) and stirred at room temperature. The diethyl ether-insoluble portion was isolated by decantation and washed with diethyl ether (~100 mL, three times). The isolated product was dissolved in methanol (2 mL), and the resulting solution was poured into diethyl ether (60 mL) and stirred at room temperature. The diethyl ether-insoluble portion was again isolated by decantation and washed with diethyl ether (~50 mL, three times). Finally, the product was dissolved in water (15 mL) and lyophilized, yielding PGE–PAMS as a light-brown viscous solid (0.423 g, yield 128%, calculated using the ideal chemical formula for the repeating unit of PGE–PAMS ( $[\text{OC}_6\text{H}_5, \text{FW} = 93.10]/[\text{OCH}_2\text{CH}(\text{CH}_2\text{OC}_3\text{H}_6\text{SC}_3\text{H}_6)\text{SiO}(\text{CH}_3), \text{FW} = 234.39]/[\text{OCH}_2\text{CH}(\text{CH}_2\text{OCH}_2\text{CH}=\text{CH}_2), \text{FW} = 114.14]/[\text{SiO}(\text{CH}_3)(\text{C}_3\text{H}_6\text{SH}), \text{FW} = 134.27] = 0.02/0.78/0.07/0.13$ ). The yield exceeded 100% due to the high viscosity of the product, which prevented the complete removal of the solvent.  $^1\text{H}$  NMR (400 MHz,  $\text{CD}_3\text{OD}$ , Fig. 2):  $\delta$  3.91–3.48 (br, 5H,  $-\text{O}-\text{CH}_2\text{CH}(\text{CH}_2\text{OCH}_2\text{CH}=\text{CH}_2)-\text{O}$ –),  $\delta$  3.48–3.39 (br, residual methanol),  $\delta$  3.25–3.10 (br, 2H,  $-\text{OCH}_2\text{CH}_2\text{CH}_2\text{SCH}_2\text{CH}_2\text{CH}_2-$ ),  $\delta$  3.10–2.64 (br, 4H,  $-\text{OCH}_2\text{CH}_2\text{CH}_2\text{SCH}_2\text{CH}_2\text{CH}_2-$  and  $-\text{CH}_2\text{CH}_2\text{CH}_2\text{SH}$ ),  $\delta$  2.15–1.98 (br, 2H,  $-\text{OCH}_2\text{CH}_2\text{CH}_2\text{SCH}_2\text{CH}_2\text{CH}_2-$ ),  $\delta$  1.98–1.74 (br,  $-\text{OCH}_2\text{CH}_2\text{CH}_2\text{SCH}_2\text{CH}_2\text{CH}_2-$  and  $-\text{CH}_2\text{CH}_2\text{CH}_2\text{SH}$ ),  $\delta$  1.05–0.54 (br,  $-\text{OCH}_2\text{CH}_2\text{CH}_2\text{SCH}_2\text{CH}_2\text{CH}_2-$  and  $-\text{CH}_2\text{CH}_2\text{CH}_2\text{SH}$ ),  $\delta$  0.42–0.02 (br, 3H,  $\text{CH}_3\text{Si}$ –). FT-IR (KBr,

Fig. S2): 1124  $\text{cm}^{-1}$  (siloxane bond and ether bond).  $^{29}\text{Si}$  NMR (79.4 MHz,  $\text{CH}_3\text{OD}$ ):  $\delta$  -17.4–-21.2 ( $\text{D}^2$ ),  $\delta$  -21.2–-24.0 ( $\text{D}^2$ ).

**Preparation of poly(DMS-*co*-MPS) (Scheme S1a).** As a precursor for PDMS-*graft*-PEG, poly(DMS-*co*-MPS) was prepared as follows: MPDMMMS (0.759 g, 4.0 mmol) and DMDMS (1.472 g, 12.0 mmol) were dissolved in methanol (1296  $\mu\text{L}$ , 32 mmol), followed by the addition of water (2880  $\mu\text{L}$ , 160 mmol) and conc. HCl (272  $\mu\text{L}$ , 3.2 mmol). The mixture was stirred at room temperature for 30 min under an argon atmosphere and then heated at *ca.* 70°C in an open system until the solvent completely evaporated (*ca.* 12 h). Subsequently, 2.5 mL methanol was added at room temperature, and the methanol-insoluble portion was isolated by decantation and washed with methanol (six times). Finally, the product was dried under reduced pressure, yielding poly(DMS-*co*-MPS) as a colorless, transparent liquid (0.147 g, yield 10%, calculated using the ideal chemical formula of the repeating unit of poly(DMS-*co*-MPS) ( $[\text{SiO}(\text{CH}_3)_2]$ , FW = 74.15)/ $[\text{SiO}(\text{CH}_3)(\text{C}_3\text{H}_6\text{SH})]$ , FW = 134.27] = 0.74/0.26).  $^1\text{H}$  NMR (400 MHz,  $\text{CDCl}_3$ , Fig. S3):  $\delta$  2.59–2.47 (m, 2H,  $-\text{CH}_2\text{CH}_2\text{CH}_2\text{SH}$ ),  $\delta$  1.71–1.60 (m, 2H,  $-\text{CH}_2\text{CH}_2\text{CH}_2\text{SH}$ ),  $\delta$  1.38–1.27 (br, 1H,  $-\text{CH}_2\text{CH}_2\text{CH}_2\text{SH}$ ),  $\delta$  0.71–0.57 (m, 1H,  $-\text{CH}_2\text{CH}_2\text{CH}_2\text{SH}$ ),  $\delta$  0.15–0.05 (s, 9H,  $-\text{SiCH}_3$ ). GPC:  $M_n = 7.76 \times 10^3$ ,  $M_w/M_n = 1.17$ .  $^{29}\text{Si}$  NMR (79.4 MHz,  $\text{CDCl}_3$ , Fig. S4):  $\delta$  -10.3–-11.2 ( $\text{D}^1_{(\text{DM})}$ ),  $\delta$  -12.1–-12.9 ( $\text{D}^1_{(\text{SH})}$ ),  $\delta$  -21.0–-22.5 ( $\text{D}^2_{(\text{DM})}$ ),  $\delta$  -22.5–-23.7 ( $\text{D}^2_{(\text{SH})}$ ).

**Preparation of PDMS-*graft*-PEG (Scheme S1b).** A solution of poly(DMS-*co*-MPS) (0.047 g, 0.52 mmol unit) in dehydrated THF (0.5 mL) and PEG-A (0.079 g, 0.12 mmol) in dehydrated THF (0.5 mL) was added to BAPO (0.001 g, 1.2  $\mu\text{mol}$ ). The resulting solution was stirred at room temperature under an argon atmosphere and then irradiated with light (wavelength: 380–420 nm) for 5 min. Finally, THF was removed using a rotary evaporator, and the product was dried under reduced pressure, yielding PDMS-*graft*-PEG as a colorless, transparent liquid (0.1047 g, yield 77%, calculated using the ideal chemical formula of the repeating unit of PDMS-*graft*-PEG ( $[\text{SiO}(\text{CH}_3)_2]$ , FW = 74.15)/ $[\text{SiO}(\text{CH}_3)(\text{C}_3\text{H}_6\text{SC}_2\text{H}_4\text{CO}(\text{OC}_2\text{H}_4)_{13}\text{OCH}_3)]$ , FW = 793.05] = 0.74/0.26).  $^1\text{H}$  NMR (400 MHz,  $\text{CDCl}_3$ , Fig. S5):  $\delta$  4.33–4.16 (broad, 2H,  $-\text{SCH}_2\text{CH}_2\text{C}(=\text{O})\text{OCH}_2\text{CH}_2-$ ),  $\delta$  3.77–3.56 (m, 54H,  $-\text{SCH}_2\text{CH}_2\text{C}(=\text{O})\text{OCH}_2\text{CH}_2(\text{OCH}_2\text{CH}_2)_{12}\text{OCH}_3$ ),  $\delta$  3.42–3.35 (s, 3H,  $-\text{C}(=\text{O})\text{OCH}_2\text{CH}_2(\text{OCH}_2\text{CH}_2)_{12}\text{OCH}_3$ ),  $\delta$  2.82–2.72 (m, 2H,  $-\text{SCH}_2\text{CH}_2\text{C}(=\text{O})\text{OCH}_2\text{CH}_2-$ ),  $\delta$

2.72–2.59 (m, 2H,  $-\text{SCH}_2\text{CH}_2\text{C}(=\text{O})\text{OCH}_2\text{CH}_2-$ ),  $\delta$  2.59–2.46 (m, 2H,  $-\text{CH}_2\text{CH}_2\text{CH}_2\text{S}-$ ),  $\delta$  1.74–1.54 (m, 2H,  $-\text{CH}_2\text{CH}_2\text{CH}_2\text{S}-$ ),  $\delta$  1.40–1.23 (br, 1H,  $-\text{CH}_2\text{CH}_2\text{CH}_2\text{SH}$ ),  $\delta$  0.72–0.54 (m, 2H,  $-\text{CH}_2\text{CH}_2\text{CH}_2\text{S}-$ ),  $\delta$  0.20–0.02 (s, 9H,  $-\text{SiCH}_3$ ). GPC:  $M_n = 1.71 \times 10^4$ ,  $M_w/M_n = 1.18$ .

**Measurements.** FT-IR spectra were recorded using an FT/IR-4200 spectrometer (JASCO Corporation, Tokyo, Japan).  $^1\text{H}$  and  $^{29}\text{Si}$  NMR spectra were recorded with an ECX-400 spectrometer (JEOL RESONANCE Inc., Tokyo, Japan). The average molecular weight and molecular weight distribution were determined by GPC using poly(methyl methacrylate) standards. For the GPC analysis, SHIMADZU CTO-20AC and a SHIMADZU RID-20A (Shimadzu Corporation, Kyoto, Japan) were employed, using Shodex KF-803L (bead size: 6  $\mu\text{m}$ , measurable molecular weight range:  $1.0 \times 10^2$ – $7.0 \times 10^4$ ) and Shodex KF-805L (bead size: 6  $\mu\text{m}$ , measurable molecular weight range:  $1.0 \times 10^2$ – $5.0 \times 10^6$ ) columns. THF was used as the eluent and pumped through the system at a flow rate of 1.0  $\text{mL min}^{-1}$  at 40°C. Transmission electron microscopy (TEM) measurements were performed using a JEM-2100 plus transmission electron microscope equipped with a  $\text{LaB}_6$  source (JEOL Ltd., Tokyo, Japan) and operated at an acceleration voltage of 200 kV. TEM images were then recorded with a  $3,072 \times 3,072$  pixel Rio 9 CMOS camera (Gatan Co., Ltd., USA). A 1.0 wt% aqueous solution of PGE–PAMS was prepared, and 10  $\mu\text{L}$  of the solution was dropped onto an elastic carbon grid (Okenshoji Co., Ltd.), left to stand for 30 s, and then absorbed with filter paper and dried. Particle sizes were measured using an ELSZ-2000 DLS apparatus (Otsuka Electronics Co., Ltd., Osaka, Japan). To this aim, PGE–PAMS was dissolved in water, DMSO, methanol, ethanol and isopropyl alcohol at 0.1 w/v% and left to stand overnight. The resulting solution (3.0 mL) was then placed in a quartz cell (GL Science Inc., Tokyo, Japan) for DLS measurements. Volume-average distributions were calculated using the cumulant method. The refractive indices of the solvents used in the measurements were 1.3300 for water, 1.4780 for DMSO, 1.3299 for methanol, 1.3628 for ethanol and 1.3781 for isopropyl alcohol. The UV–Vis spectra were recorded using a JASCO V-630 spectrophotometer (JASCO Corporation, Tokyo, Japan). In the measurements shown in Fig. 8, the heating and cooling processes were controlled using a Peltier ETCR-762 thermosted cell holder and CTU-100 circulating water sources (JASCO Corporation, Tokyo, Japan), with temperatures ranging from 5°C to 90°C at a rate of 1°C  $\text{min}^{-1}$ . The transmittance ( $\lambda = 500$  nm) of the 0.1 w/v% aqueous solution was measured during heating from 5°C to 90°C under a nitrogen atmosphere.

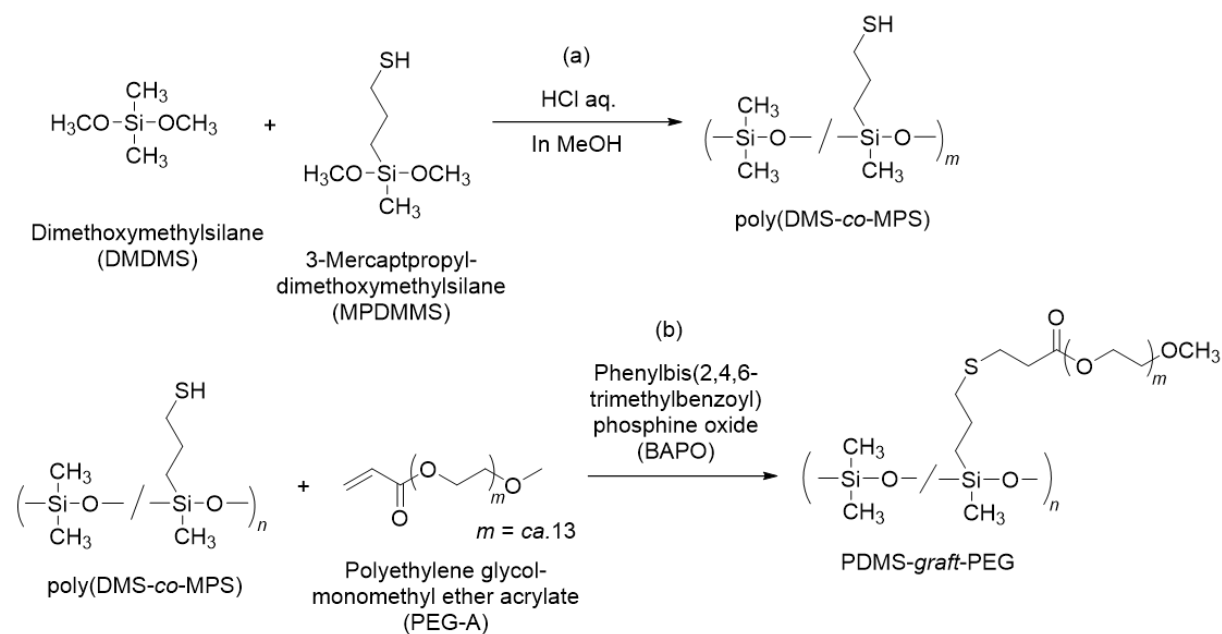

**Scheme S1** Preparation of (a) poly(DMS-co-MPS) and (b) PDMS-graft-PEG.

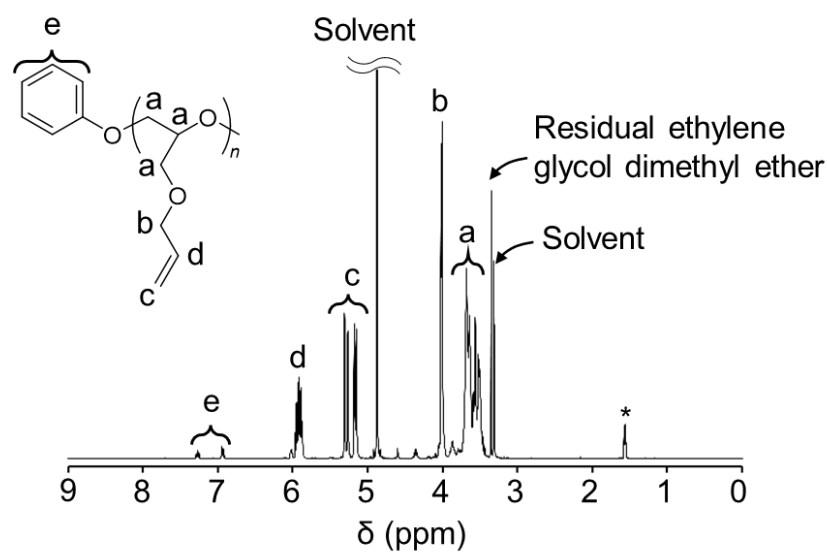

**Fig. S1**  $^1\text{H}$  NMR spectrum of PAGE in  $\text{CD}_3\text{OD}$ . The chemical shifts are referenced to  $\text{CD}_3\text{OD}$  ( $\delta$  3.31). \*: Unknown signal.

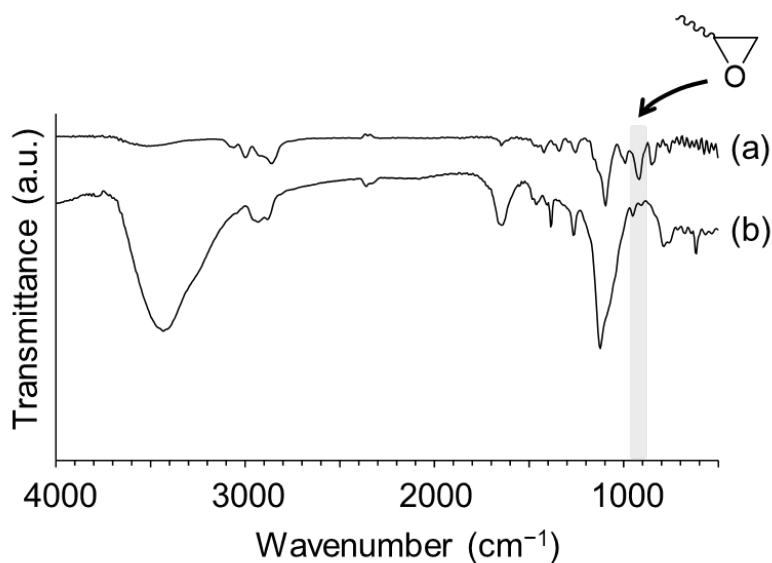

**Fig. S2** FT-IR spectra of (a) allyl glycidyl ether and (b) PGE-PAMS in KBr pellets.

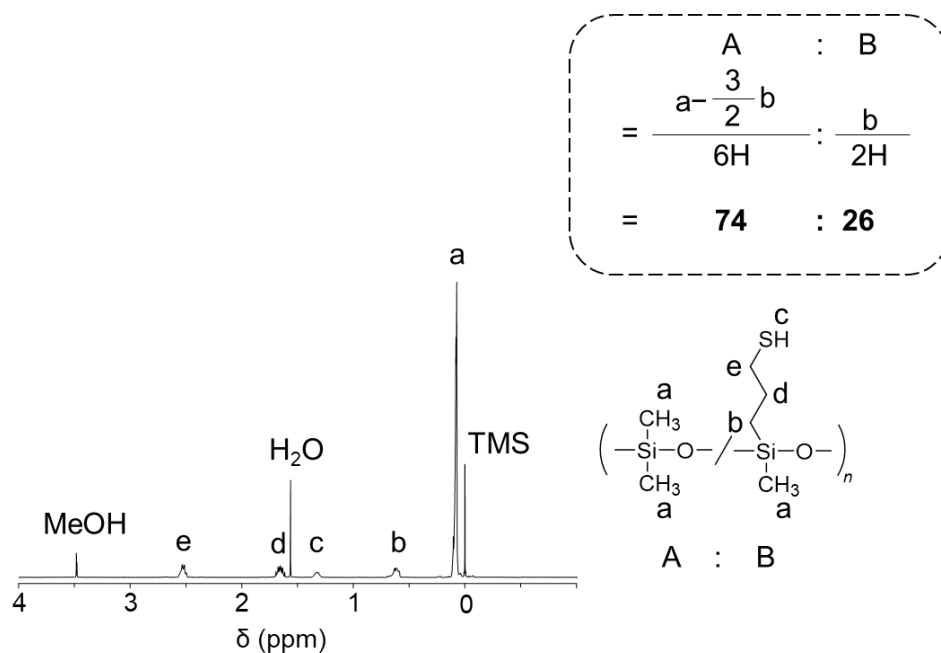

**Fig. S3**  $^1\text{H}$  NMR spectrum of poly(DMS-*co*-MPS) in  $\text{CDCl}_3$ . The chemical shifts are referenced to TMS ( $\delta$  0.0).

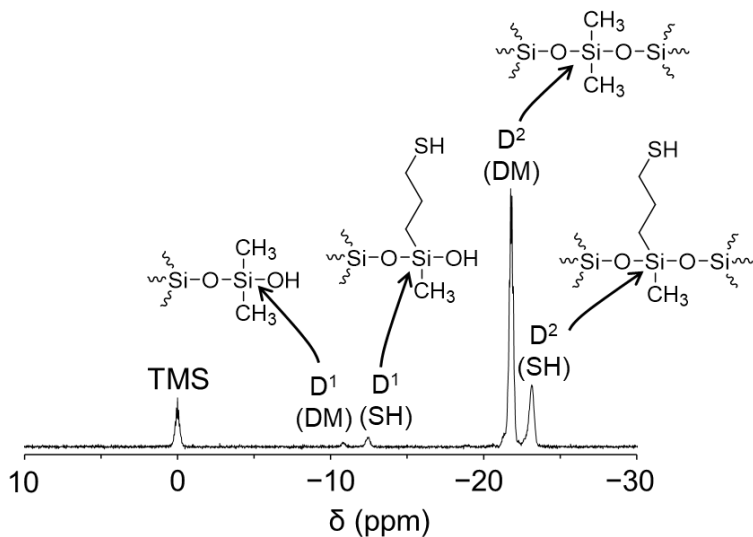

**Fig. S4**  $^{29}\text{Si}$  NMR spectrum of poly(DMS-*co*-MPS) in  $\text{CDCl}_3$  at room temperature. A small amount of  $\text{Cr}(\text{acac})_3$  was added as a relaxation agent. The chemical shifts are referenced to TMS ( $\delta$  0.0).

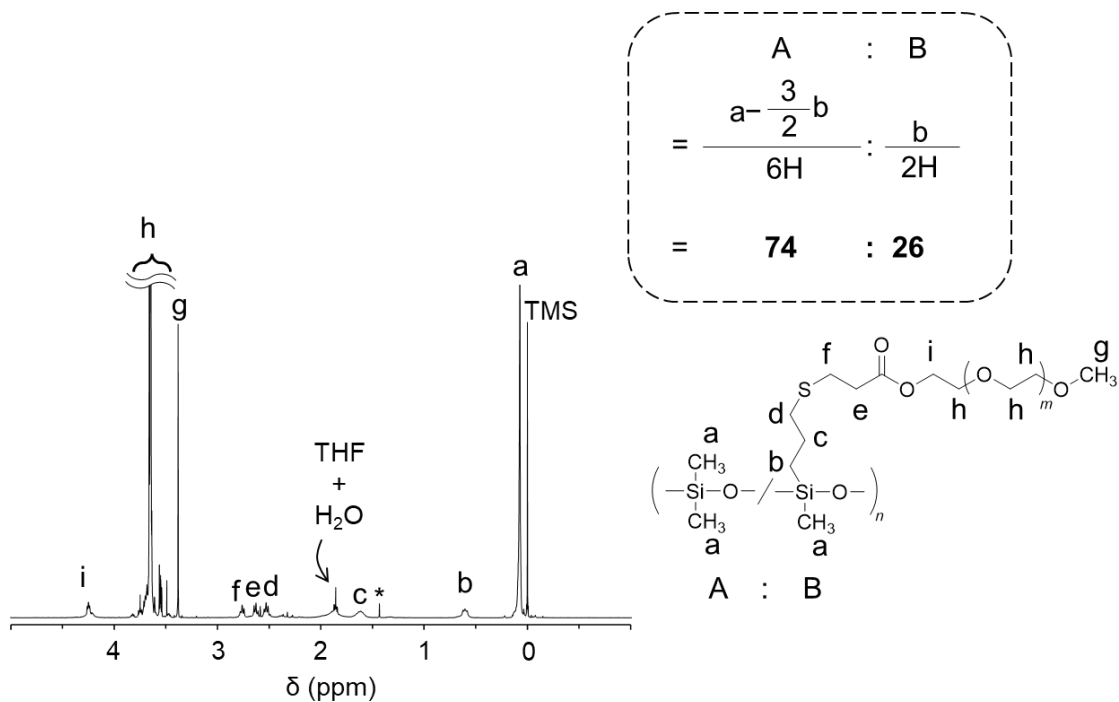

**Fig. S5**  $^1\text{H}$  NMR spectrum of PDMS-*graft*-PEG in  $\text{CDCl}_3$ . The chemical shifts are referenced to TMS ( $\delta$  0.0). \*: Unknown signal.



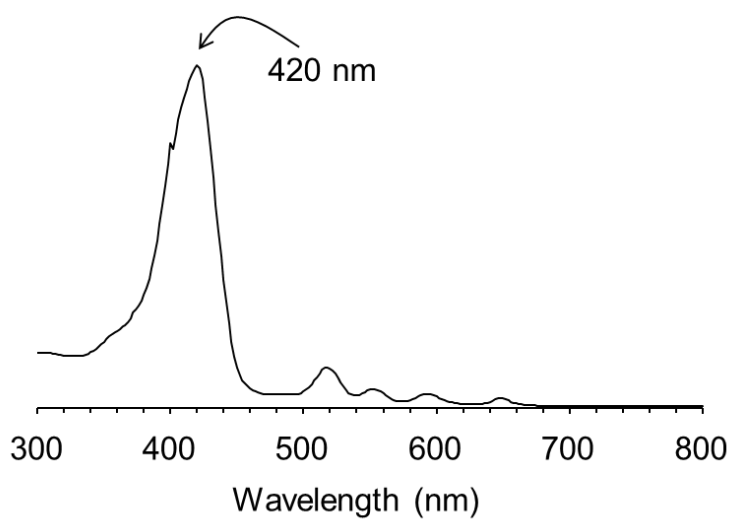

**Fig. S6** UV-Vis spectrum of a water/DMF (9/1, v/v) solution of a mixture of PGE-PAMS ( $2.0 \times 10^{-3}$  w/v%) and TPP ( $5.0 \times 10^{-4}$  w/v%).

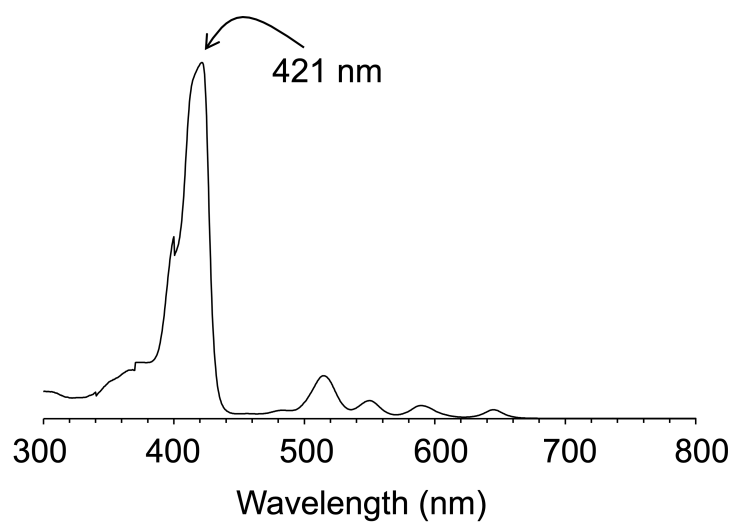

**Fig. S7** UV-Vis spectrum of a chloroform solution of TPP ( $5.0 \times 10^{-4}$  w/v%).

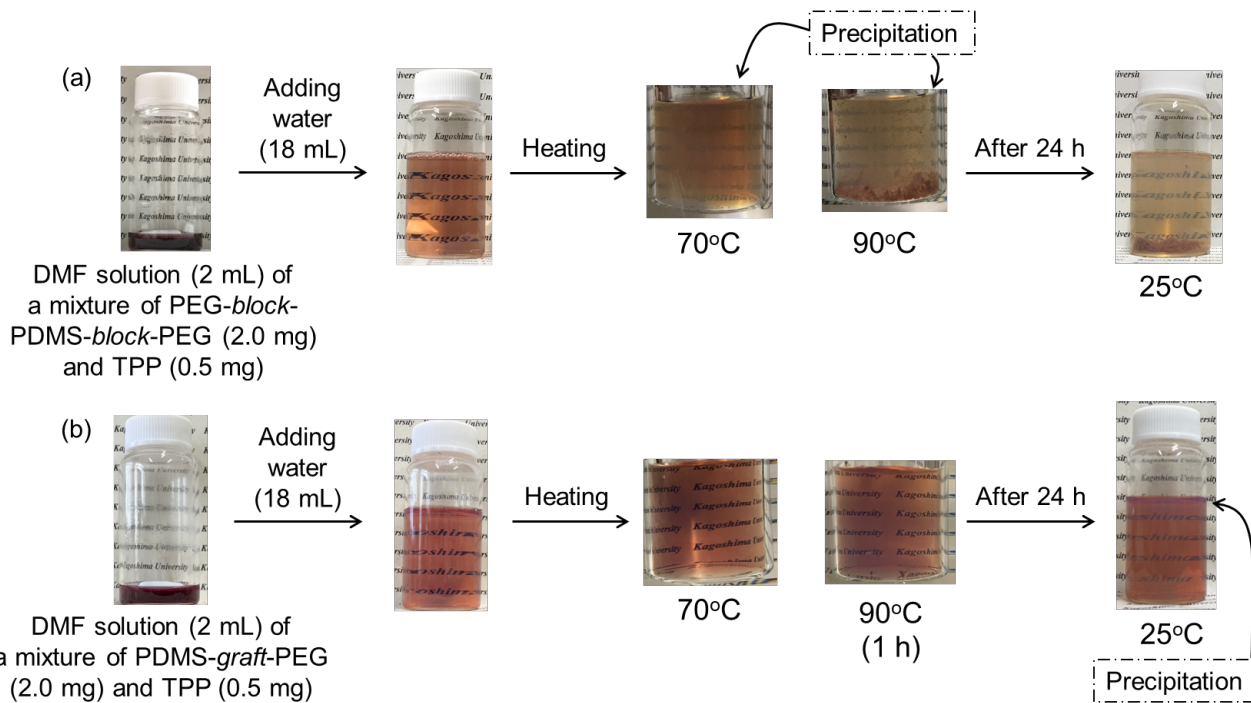

**Fig. S8** Photographs of water/DMF (9/1, v/v) solutions of (a) a mixture of PEG-*block*-PDMS-*block*-PEG and TPP and (b) a mixture of PDMS-*graft*-PEG and TPP at varying temperatures.
